# Supplementary material for: Mobile monitoring reveals the importance of non-vehicular particulate matter sources in London
Source: Royal Society of Chemistry journal article supplement (doi:10.1039/d4em00552j), 2024-01-01
Supplement: d4em00552j1.pdf [file d4em00552j1.pdf]

# Supplementary Information

## Mobile monitoring reveals the importance of non-vehicular particulate matter sources in London

Samuel Wilson<sup>\*a</sup>, Naomi J. Farren<sup>a</sup>, Shona E. Wilde<sup>a</sup>, Rebecca L. Wagner<sup>a</sup>, James D. Lee<sup>a</sup>,  
Lauren E. Padilla<sup>b</sup>, Greg Slater<sup>c</sup>, Daniel Peters<sup>b</sup>, and David. C. Carslaw<sup>a,d</sup>

<sup>a</sup> Wolfson Atmospheric Chemistry Laboratories, University of York, Innovation Way, Heslington, York YO10 5DD, United Kingdom.

<sup>b</sup> Environmental Defense Fund, 18 Tremont Street, Boston, MA, 02108, United States.

<sup>c</sup> Environmental Defense Fund Europe, 3rd Floor, 41 Eastcheap, London, EC3M 1DT, United Kingdom.

<sup>d</sup> Ricardo Energy & Environment, The Gemini Building, Fermi Avenue, Harwell OX11 0QR, United Kingdom.

# 1 Distance-weighted PM Concentrations

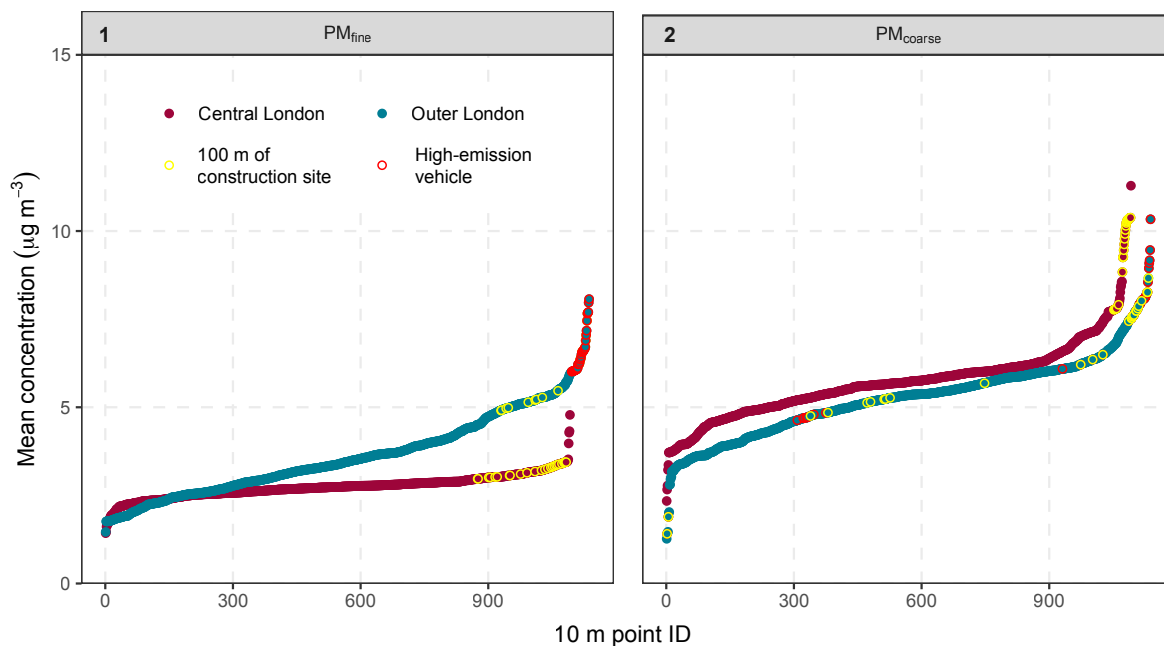

**Figure S1** Distribution of distance-weighted mean concentration enhancement values for  $PM_{fine}$  (panel 1) and  $PM_{coarse}$  (panel 2) for each measurement location. The x-axis represents the identifier for each (10 m spaced) point arranged in ascending order of concentration. Points highlighted in yellow were within 100 m of construction sites A and B, and point highlighted in red were on the road section that contained the high-emission vehicle.

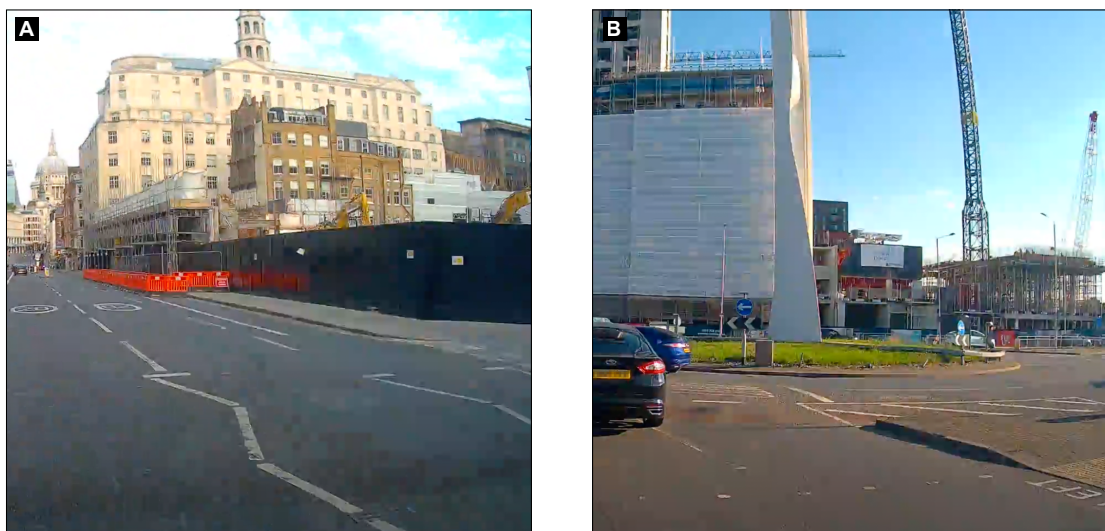

**Figure S2** Photos of construction sites A and B in Central and Outer London, captured by the mobile platform onboard camera.

## 2 High-emission Vehicles

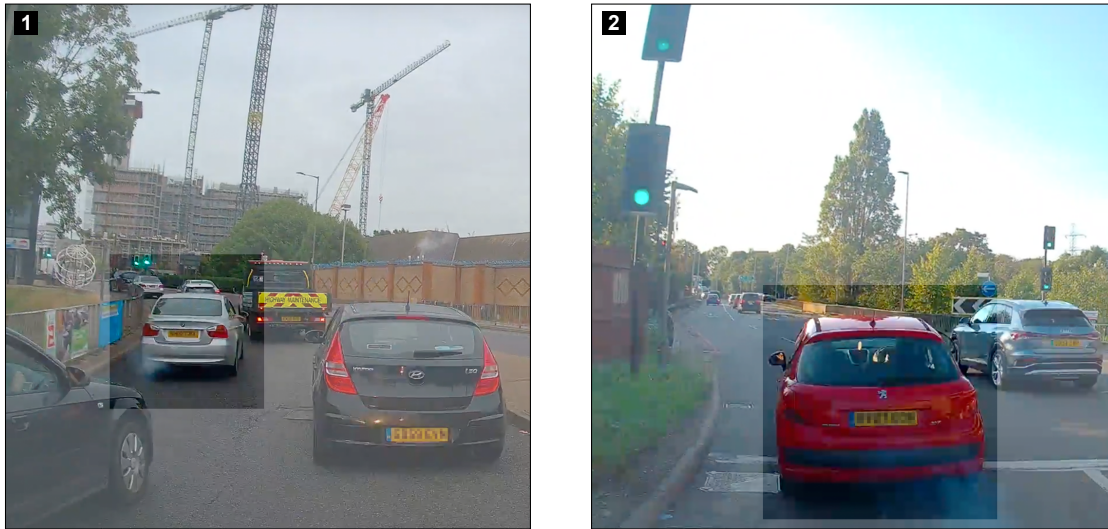

**Figure S3** Photos of the high emission vehicles measured in Outer London, captured by the mobile platform onboard camera. Photo 1 is a vehicle measured on the driving route and photo 2 is a second vehicle measured off the driving route.

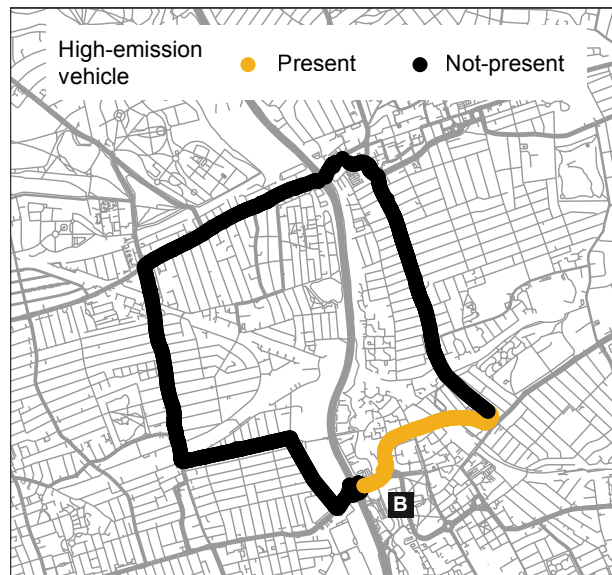

**Figure S4** Map of the Outer London Driving route highlighting the section on which the high-emission vehicle was present. The label B denotes the position of a major construction site.

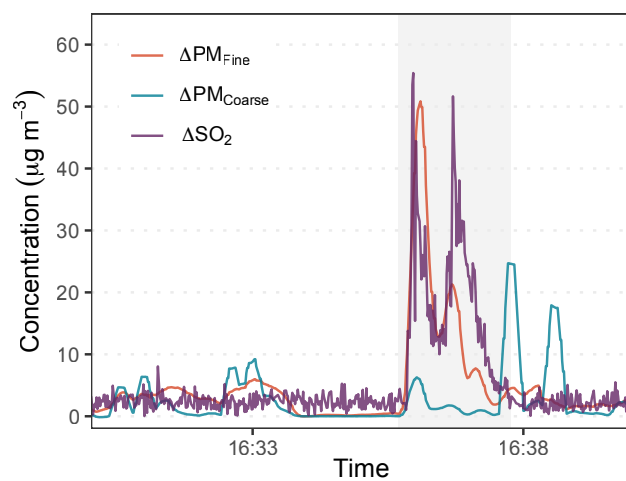

**Figure S5** Time series tracking a high emission vehicle in Outer London, outside of the designated driving route. The grey shaded area represents the time period during which vehicle was being measured.



### 3 Non-vehicular PM Sources

**Table S1** Mean PM enhancement concentrations for wet and dry weather conditions in Central London, presented with 95% confidence intervals. Measurements made within 100 m of construction site A were excluded.

| Species                           | Concentration ( $\mu\text{g m}^{-3}$ ) |                 |
|-----------------------------------|----------------------------------------|-----------------|
|                                   | Dry                                    | Wet             |
| $\Delta\text{PM}_{\text{fine}}$   | $2.48 \pm 0.02$                        | $2.88 \pm 0.03$ |
| $\Delta\text{PM}_{\text{coarse}}$ | $5.85 \pm 0.10$                        | $4.96 \pm 0.07$ |

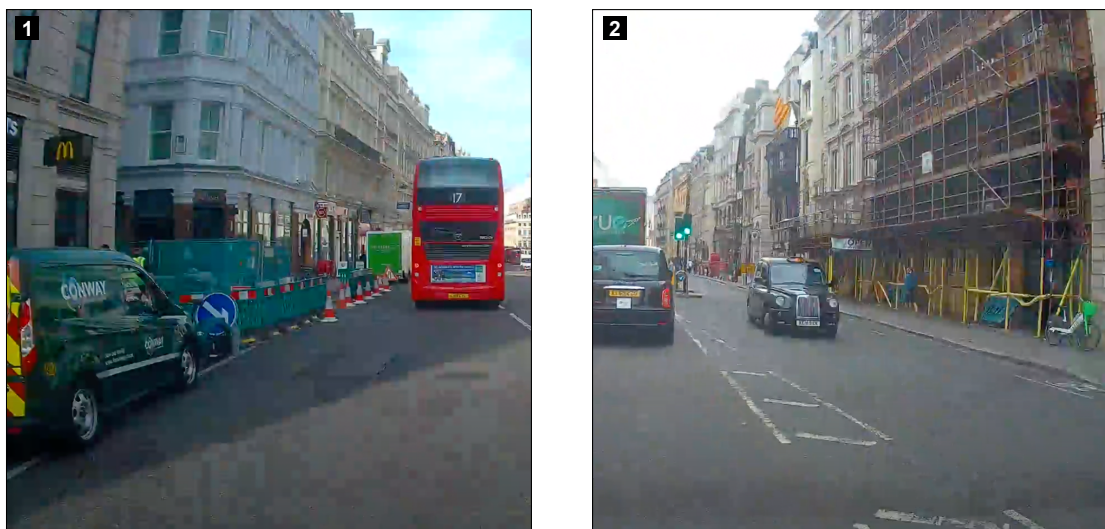

**Figure S6** Photos of the secondary construction sites in Central London, captured by the mobile laboratory onboard camera.

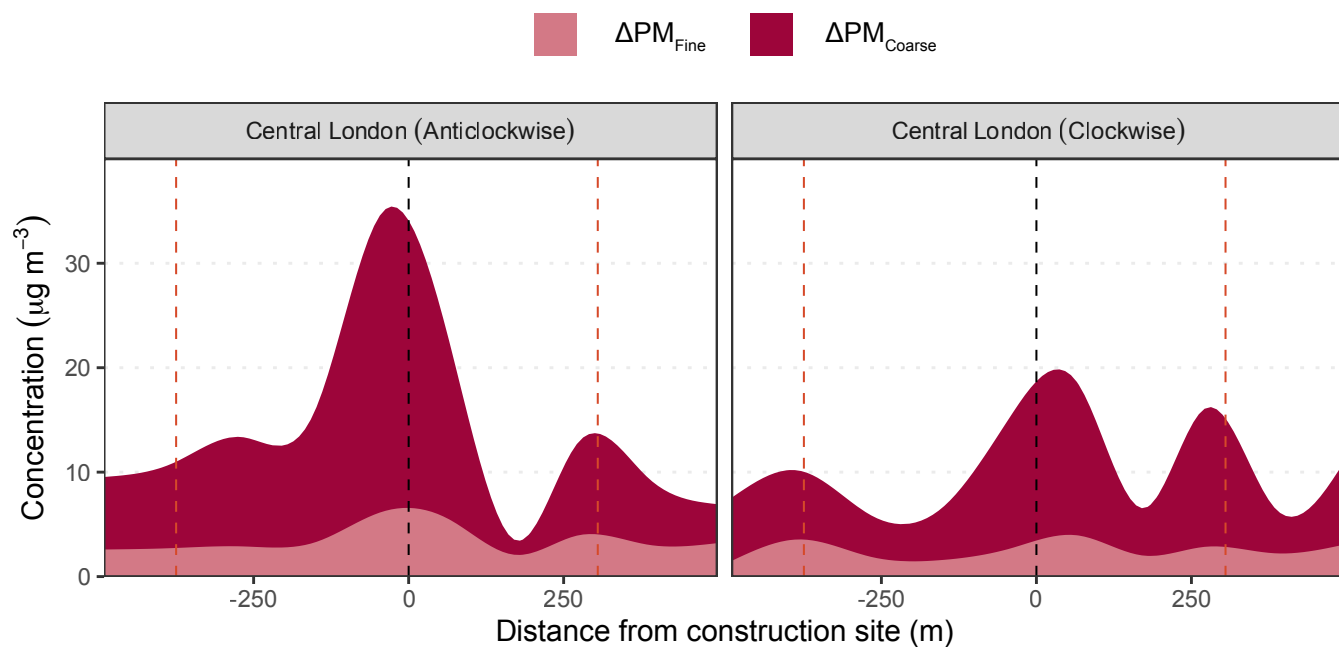

**Figure S7** Concentrations of  $\Delta\text{PM}_{\text{fine}}$  and  $\Delta\text{PM}_{\text{coarse}}$  within a 1 km road segment centred on construction site A in Central London, calculated using GAMs. The data are separated by direction of travel along the driving route. The two orange dashed lines denote the position of smaller secondary construction work.
